# Supplementary material for: Loss of T-cell quiescence by targeting Slfn2 prevents the development and progression of T-ALL
Source: PubMed Central journal article supplement (PMC5216906; doi:10.18632/oncotarget.9390), 2016-05-17
Supplement: oncotarget-07-46835-s001.pdf [file oncotarget-07-46835-s001.pdf]

## “Loss of T-cell quiescence by targeting Slfn2 prevents the development and progression of T-ALL”

### Supplementary Material

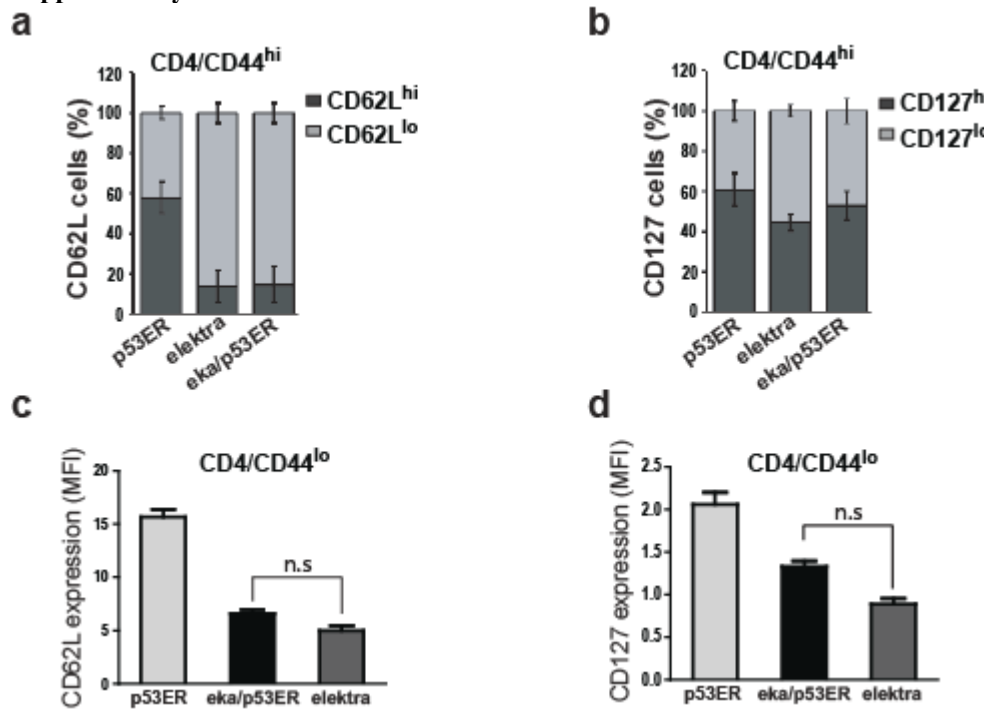

**Supplementary Figure 1:** Elektra/p53ER<sup>TAM</sup> CD4<sup>+</sup> T-cells exist in a semiactivated state. **(a)** Frequency of CD62L<sup>hi</sup> and CD62L<sup>lo</sup> cells in the CD44<sup>hi</sup> population of CD4<sup>+</sup> T-cells from p53ER<sup>TAM</sup>, elektra/p53ER<sup>TAM</sup> and elektra mice (n=4 per genotype) **(b)** Frequency of CD127<sup>hi</sup> and CD127<sup>lo</sup> cells in the CD44<sup>hi</sup> population of CD4<sup>+</sup> T-cells from p53ER<sup>TAM</sup>, elektra/p53ER<sup>TAM</sup> and elektra mice (n=4 per genotype). Mean fluorescence intensity (MFI) of **(c)** CD62L (L-selectin) and **(d)** CD127 (IL7R $\alpha$ ) staining in the CD44<sup>lo</sup> population of CD4<sup>+</sup> T-cells from p53ER<sup>TAM</sup>, elektra/p53ER<sup>TAM</sup> and elektra mice (n=4 per genotype). \**P* < 0.001 (two-tailed Student's t-test). Results are representative of two experiments. Error bars, s.e.



TAGCTCCTGCATGGGGGGCATGAACCGCCGACCTATCCTTACCATCATCACACTGGAAGA  
CTCCAGTGGGAACCTTCTGGGACGGGACAGCTT**TGA**GGTTCGTGTTTGTGCCTGCCCTGG  
|||||  
CTCCAGTGGGAACCTTCTGGGACGGGACAGCTT**TGA**GGTTCGTGTTTGTGCCTGCCCTGG

**Supplementary Figure 2:** Sequence of p53 in EL4 cell line. Sequence analysis results of the p53 coding sequence from cDNA of B57BL/6J (red font) splenocytes and EL4 lymphoma cell line (black font). Start codon marked in green and STOP codon in yellow.

### **Primers for Real Time PCR**

| Gene (mouse) |         | Sequence                       |
|--------------|---------|--------------------------------|
| Ubc          | Forward | CAG CCG TAT ATC TTC CCA GAC T  |
|              | Reverse | CTC AGA GGG ATG CCA GTA ATC TA |
| Mdm2         | Forward | TGT GTG AGC TGA GGG AGA TG     |
|              | Reverse | CAC TTA CGC CAT CGT CAA GA     |
| Mdmx         | Forward | ACA AGA AGA CGG TGG AGG TG     |
|              | Reverse | CAC TGC CAC TCA TCC TCA GA     |
| p21          | Forward | TCC ACA GCG ATA TCC AGA CA     |
|              | Reverse | AGA CAA CGG CAC ACT TTG CT     |
| Cyclin G1    | Forward | GCT GGC GCT ATC TAT CCT TG     |
|              | Reverse | GGT CAA ATC TCG GCC ACT TA     |
| Bax          | Forward | ATG CGT CCA CCA AGA AGC TGA    |
|              | Reverse | AGC AAT CAT CCT CTG CAG CTC C  |
| Puma         | Forward | CAA GAA GAG CAG CAT CGA CA     |
|              | Reverse | CTC CAG GAT CCC TGG GTA AG     |

### **Sequencing primers for p53 (mouse)**

| Gene |         | Primer                     |
|------|---------|----------------------------|
| p53  | Forward | ATC CTG GCT GTA GGT AGC GA |
|      | Reverse | GGA GGA TTG TGT CTC AGC CC |
